# Supplementary material
Source: HighWire-hosted journal article supplement (https://bmjopen.bmj.com/content/14/8/e081241)

## Supplementary File

**Table S1. Summary of the 19 Rapid Diagnostic Tests reported on MoH 706 tool of Kenya's HMIS (DHIS2).**

| RDTs                                        | WHO EDL classification                   | Disease outcome         | Common | Expected level of reporting |
|---------------------------------------------|------------------------------------------|-------------------------|--------|-----------------------------|
| HIV                                         | Sexually transmitted infections          | HIV                     | Y      | Level 2-6                   |
| Venereal disease research laboratory (VDRL) | Sexually transmitted infections          | Syphilis                | Y      | Level 2-6                   |
| Urine Chemistry                             | Clinical chemistry                       | UTI, Kidney Disease     | Y      | Level 2-6                   |
| Human chorionic gonadotropin (HCG)          | Clinical chemistry                       | Pregnancy               | Y      | Level 2-6                   |
| Blood Sugar                                 | Clinical chemistry                       | Diabetes                | Y      | Level 2-6                   |
| Malaria RDT                                 | Bacteriology, mycology, and parasitology | Malaria                 | Y      | Level 2-3                   |
| H. pylori                                   | Clinical chemistry                       | Peptic Ulcers           | Y      | Level 2-6                   |
| Blood Group                                 | Haematology                              | Blood Transfusion       | Y      | Level 2-6                   |
| HB estimation                               | Haematology                              | Anemia                  | Y      | Level 2-6                   |
| Rheumatoid factor                           | Clinical chemistry                       | Rheumatoid Arthritis    | Y      | Level 2-6                   |
| Brucella                                    | Clinical chemistry                       | Brucellosis             | Y      | Level 2-6                   |
| Anti streptolysin o titer (ASOT)            | Clinical chemistry                       | Strep Infection         | Y      | Level 4-6                   |
| CHEW Malaria RDTs                           | Bacteriology, mycology, and parasitology | Malaria                 | Y      | Level 1                     |
| Hepatitis B test*                           | Clinical chemistry                       | Hepatitis B             | Y      | Level 2-6                   |
| Treponema Pallidum Hemagglutination (TPHA)  | Sexually transmitted infections          | Syphilis                | N      | Level 4-6                   |
| Cryptococcal Antigen (CRAG) test**          | Clinical chemistry                       | Cryptococcal Meningitis | Y      | Level 2-6                   |
| Hepatitis A test *                          | Clinical chemistry                       | Hepatitis A             | Y      | Level 2-6                   |
| Hepatitis C test*                           | Clinical chemistry                       | Hepatitis C             | Y      | Level 2-6                   |
| Oral Glucose Tolerance Test (OGTT)          | Clinical chemistry                       | Diabetes                | N      | Level 2-6                   |

\*Hep A & C need a medical officer to interpret results hence not commonly found in Levels 2 & 3. Hep B is a priority test for ANC and should be performed more often in primary facilities. \*\*The CRAG test is mostly available at facilities that offer antiretroviral therapy.

Figure S1. Kenya's 47 counties (black), water bodies protected areas and population density.

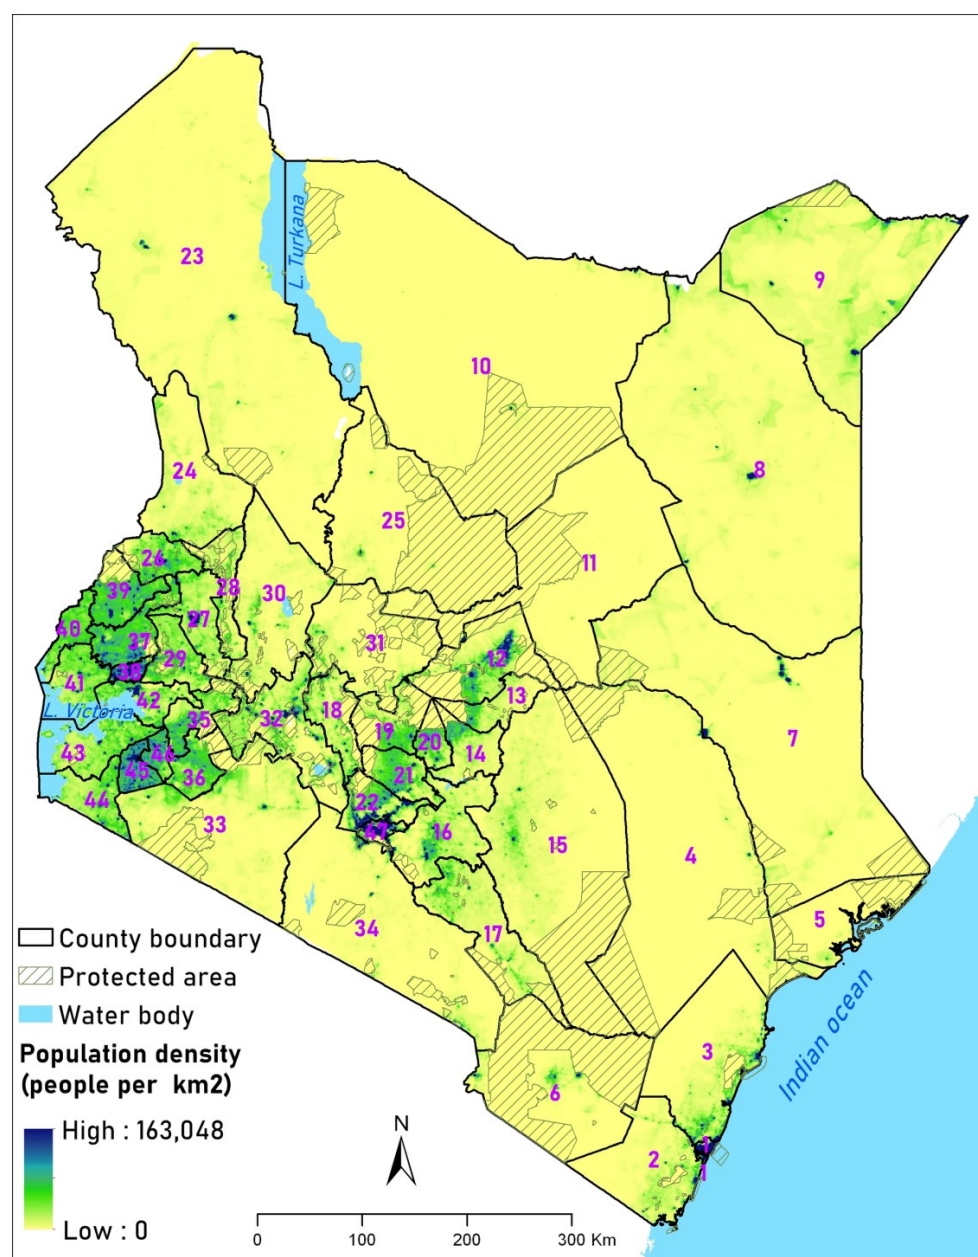

Mombasa [1], Kwale [2], Kilifi [3], Tana River [4], Lamu [5], Taita Taveta [6], Garissa [7], Wajir [8], Mandera [9], Marsabit [10], Isiolo [11], Meru [12], Tharaka-Nithi [13], Embu [14], Kitui [15], Machakos [16], Makueni [17], Nyandarua [18], Nyeri [19], Kirinyaga [20], Murang'a [21], Kiambu [22], Turkana [23], West Pokot [24], Samburu [25], Trans Nzoia [26], Uasin Gishu [27], Elgeyo-Marakwet [28], Nandi [29], Baringo [30], Laikipia [31], Nakuru [32], Narok [33], Kajiado [34], Kericho [35], Bomet [36], Kakamega [37], Vihiga [38], Bungoma [39], Busia [40], Siaya [41], Kisumu [42], Homa Bay [43], Migori [44], Kisii [45], Nyamira [46], Nairobi [47].

**Figure S2. A flow chart summarizing the processes used in to estimate demand, supply, and unmet needs of RDTs using routine data in Kenya.**

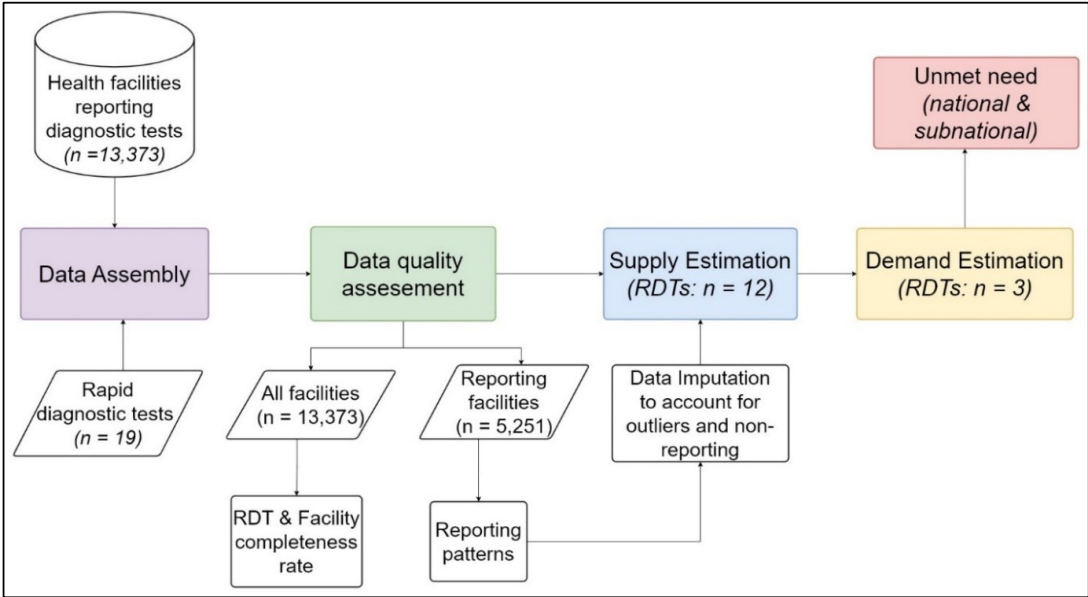

**Figure S3. A line graph of Urine Chemistry RDT reporting for six facilities across 36 months (Jan 2018-Dec 2020) indicate outliers identified using the MAD approach (square symbols) .**

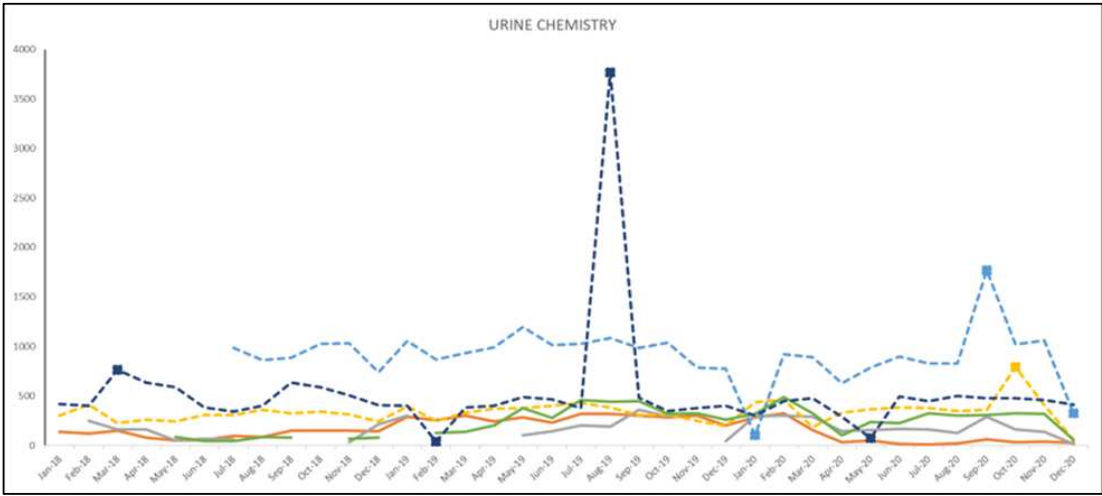

**Table S2: A list of under-5 fever-care seeking rates obtained from the Malaria Indicator Survey 2020 (MIS) and HIV testing rate of persons aged 15-64 yrs from the Kenya Aids Indicator Survey (KAIS) used in computing Malaria RDT and HIV RDT demand.**

| County          | Fever-care seeking rate             |      | HIV Testing Rate  |      |
|-----------------|-------------------------------------|------|-------------------|------|
|                 | Malaria Risk Zone                   | %    | Province          | %    |
| Baringo         | Highland Epidemic Zone\Seasonal     | 74.0 | Rift Valley North | 65.7 |
| Bomet           | Highland Epidemic Zone              | 74.0 | Rift Valley South | 65.7 |
| Bungoma         | Lake Endemic\Highland Epidemic Zone | 74.0 | Western           | 67.6 |
| Busia           | Lake Endemic                        | 56.7 | Western           | 67.6 |
| Elgeyo-Marakwet | Highland Epidemic Zone\Seasonal     | 74.0 | Rift Valley North | 65.7 |
| Embu            | Seasonal\Low risk                   | 68.8 | Eastern South     | 68.4 |
| Garissa         | Seasonal                            | 68.8 | North Eastern     | 71.3 |
| Homa Bay        | Lake Endemic                        | 56.7 | Nyanza            | 79.9 |
| Isiolo          | Seasonal                            | 68.8 | Eastern North     | 63.1 |
| Kajiado         | Seasonal                            | 68.8 | Rift Valley South | 65.7 |
| Kakamega        | Lake Endemic\Highland Epidemic Zone | 74.0 | Western           | 67.6 |
| Kericho         | Highland Epidemic Zone              | 74.0 | Rift Valley South | 65.7 |
| Kiambu          | Low risk                            | 63.6 | Central           | 69   |
| Kilifi          | Coastal Endemic                     | 64.0 | Coast             | 72.3 |
| Kirinyaga       | Low risk                            | 63.6 | Central           | 69   |
| Kisii           | Highland Epidemic Zone              | 74.0 | Nyanza            | 79.9 |
| Kisumu          | Lake Endemic                        | 56.7 | Nyanza            | 79.9 |
| Kitui           | Seasonal                            | 68.8 | Eastern South     | 68.4 |
| Kwale           | Coastal Endemic                     | 64.0 | Coast             | 72.3 |
| Laikipia        | Low risk                            | 63.6 | Rift Valley North | 65.7 |
| Lamu            | Coastal Endemic                     | 64.0 | Coast             | 72.3 |
| Machakos        | Low risk                            | 63.6 | Eastern South     | 68.4 |
| Makueni         | Low risk                            | 63.6 | Eastern South     | 68.4 |
| Mandera         | Seasonal                            | 68.8 | North Eastern     | 71.3 |
| Marsabit        | Seasonal                            | 68.8 | Eastern North     | 63.1 |
| Meru            | Seasonal\Low risk                   | 68.8 | Eastern North     | 63.1 |
| Migori          | Lake Endemic                        | 56.7 | Nyanza            | 79.9 |
| Mombasa         | Coastal Endemic                     | 64.0 | Coast             | 72.3 |
| Murang'a        | Low risk                            | 63.6 | Central           | 69   |
| Nairobi         | Low risk                            | 63.6 | Nairobi           | 84.1 |
| Nakuru          | Low risk                            | 63.6 | Rift Valley South | 65.7 |
| Nandi           | Highland Epidemic Zone              | 74.0 | Rift Valley South | 65.7 |
| Narok           | Highland Epidemic Zone              | 74.0 | Rift Valley South | 65.7 |
| Nyamira         | Highland Epidemic Zone              | 74.0 | Nyanza            | 79.9 |
| Nyandarua       | Low risk                            | 63.6 | Central           | 69   |
| Nyeri           | Low risk                            | 63.6 | Central           | 69   |
| Samburu         | Seasonal                            | 68.8 | Rift Valley North | 65.7 |
| Siaya           | Lake Endemic                        | 56.7 | Nyanza            | 79.9 |
| Taita Taveta    | Coastal Endemic                     | 64.0 | Coast             | 72.3 |
| Tana River      | Seasonal                            | 68.8 | Coast             | 72.3 |
| Tharaka-Nithi   | Seasonal\Low risk                   | 68.8 | Eastern North     | 63.1 |
| Trans Nzoia     | Highland Epidemic Zone              | 74.0 | Rift Valley North | 65.7 |
| Turkana         | Seasonal                            | 68.8 | Rift Valley North | 65.7 |
| Uasin Gishu     | Highland Epidemic Zone              | 74.0 | Rift Valley South | 65.7 |
| Vihiga          | Lake Endemic                        | 56.7 | Western           | 67.6 |
| Wajir           | Seasonal                            | 68.8 | North Eastern     | 71.3 |
| West Pokot      | Highland Epidemic Zone\Seasonal     | 74.0 | Rift Valley North | 65.7 |

**Table S3. Summary of the 7 Rapid Diagnostic Tests that were reported by less than 50% of the facilities and excluded from estimating supply, demand, and unmet needs.**

| Rapid Diagnostic Tests (RDTs)                 | Reporting facilities, No. (%)*                                                          |                 |                 |                 |
|-----------------------------------------------|-----------------------------------------------------------------------------------------|-----------------|-----------------|-----------------|
|                                               | 2018-2020<br>(n=5251)                                                                   | 2018 (n=4381)   | 2019 (n=4656)   | 2020 (n=4863)   |
| Anti streptolysin o titer (ASOT)              |  44.4% | 1295<br>(29.6%) | 1587<br>(34.1%) | 1722<br>(35.4%) |
| Hepatitis B test                              |  43.0% | 1271<br>(29.0%) | 1584<br>(34.0%) | 1782<br>(36.6%) |
| Treponema Pallidum<br>Hemagglutination (TPHA) |  29.5% | 784<br>(17.9%)  | 865<br>(18.6%)  | 888<br>(18.3%)  |
| Cryptococcal Antigen (CRAG) test              |  25.0% | 739<br>(16.9%)  | 732<br>(15.7%)  | 789<br>(16.2%)  |
| Hepatitis A test                              |  21.8% | 482<br>(11.0%)  | 593<br>(12.7%)  | 641<br>(13.2%)  |
| Hepatitis C test                              |  21.5% | 594<br>(13.6%)  | 756<br>(16.2%)  | 758<br>(15.6%)  |
| Oral Glucose Tolerance Test (OGTT)            |  9.6%  | 240<br>(5.5%)   | 230<br>(4.9%)   | 271<br>(5.6%)   |

\*The proportion of reporting facilities per RDT was computed per year and across 36 months as the number of facilities reporting RDT out of those reporting test volumes > 0 (reporting facilities).



**Figure S4. Geographical variation in the proportion of RDT reports received from those expected to be submitted across the study period (2018-2020) by level.** The 16 RDTs included are: VDRL (Venereal disease research), HCG (Human chorionic gonadotropin), Blood sugar, Malaria RDT, H. pylori, Blood grouping, HB Estimation, Rheumatoid Factor, Brucella, ASOT (Antistreptolysin O (ASO) titer test), CHEW Malaria RDTs, TPHA (Treponema Pallidum Hemagglutination), CRAG (Cryptococcal Antigen), Hepatitis A, Hepatitis C, and OGTT (Oral Glucose Tolerance Test).

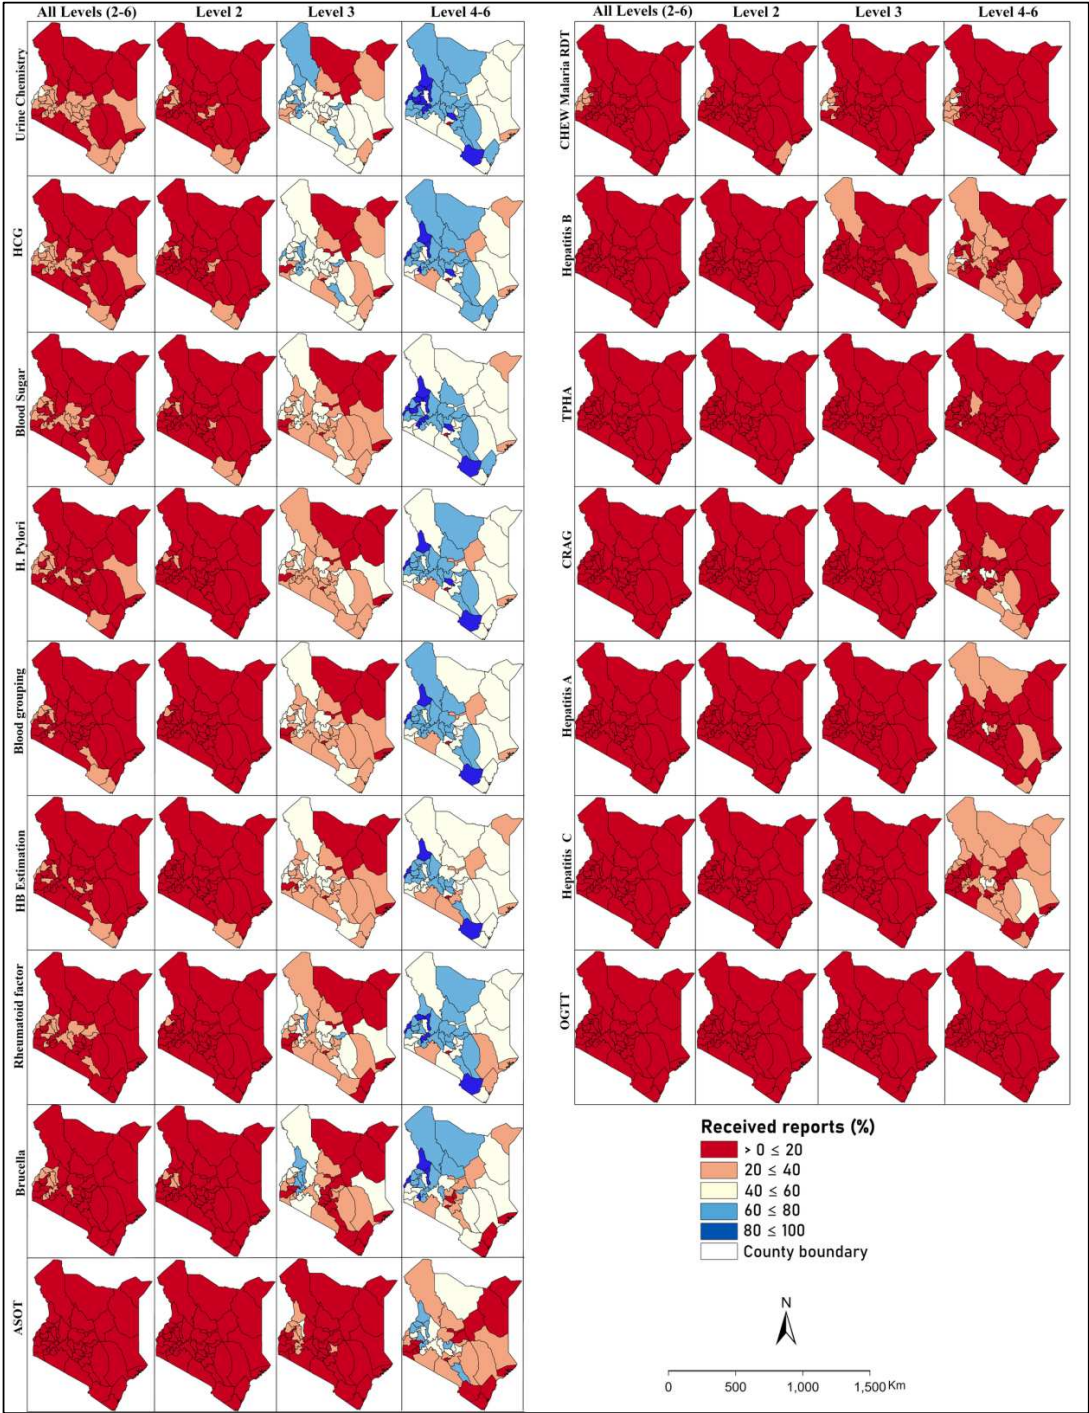

**Figure S5A. Geographic variation in supply for Urine Chemistry, HCG, Blood sugar and H. Pylori per year among all reporting facilities.**

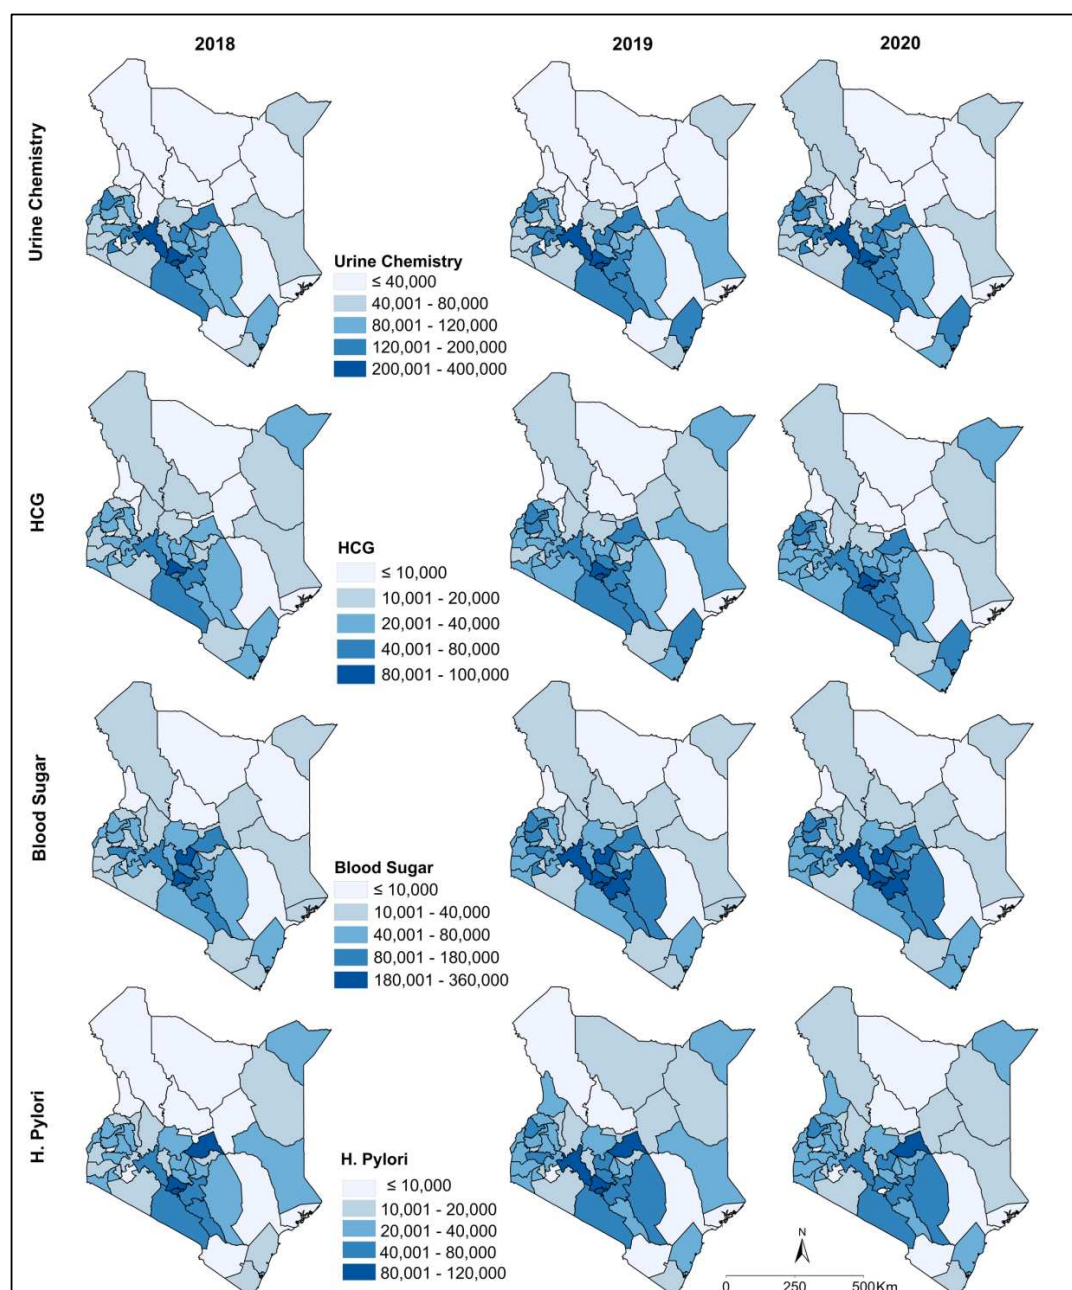



**Figure S5B. Geographic variation in supply for Blood Grouping, HB Estimation, Rheumatoid Factor and Brucella per year among all reporting facilities.**

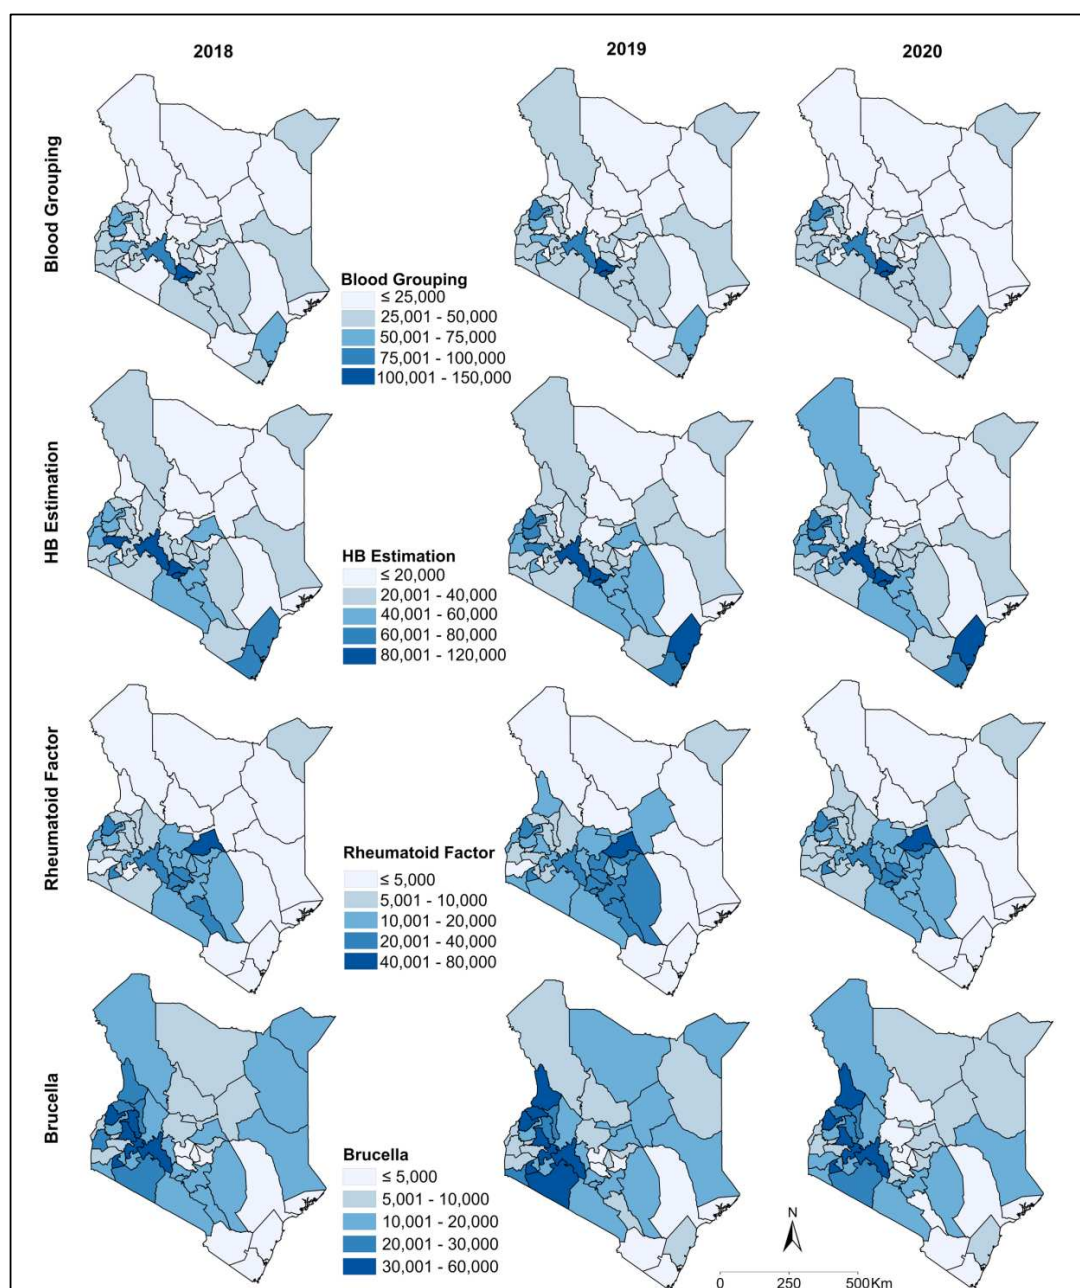

Supplement: inline-supplementary-material-1 [file inline-supplementary-material-1.pdf]
